1 DATASET BRIEF

2 **Revisiting the *Ancylostoma caninum* secretome provides new information on**  
3 **hookworm-host interactions**

4 Taylor Morante<sup>a</sup>, Catherine Shepherd<sup>b</sup>, Constantin Constantinoiu<sup>c</sup>, Alex Loukas<sup>b#</sup> and  
5 Javier Sotillo<sup>b#</sup>

6

7 <sup>a</sup> College of Public Health, Medical & Veterinary Sciences, James Cook University,  
8 Cairns, Queensland, Australia.

9 <sup>b</sup> Centre for Biodiscovery and Molecular Development of Therapeutics, Australian  
10 Institute for Tropical Health and Medicine, James Cook University, Cairns,  
11 Queensland, Australia.

12 <sup>b</sup> College of Public Health, Medical & Veterinary Sciences, James Cook University,  
13 Townsville, Queensland, Australia.

14

15 # Corresponding Authors:

16 Javier Sotillo. Centre for Biodiscovery and Molecular Development of  
17 Therapeutics, James Cook University, Cairns, 4878, Queensland, Australia. Email:  
18 [javier.sotillo@jcu.edu.au](mailto:javier.sotillo@jcu.edu.au)

19 Alex Loukas. Centre for Biodiscovery and Molecular Development of  
20 Therapeutics, James Cook University, Cairns, 4878, Queensland, Australia. Email:  
21 [alex.loukas@jcu.edu.au](mailto:alex.loukas@jcu.edu.au)

22

23 **Word count:** 3,235

24

25 **ABBREVIATIONS**

26 *AcES*: *Ancylostoma caninum* excretory/secretory products

27 DTT: Dithiothreitol

28 ESPs: excretory/secretory products

29 GST: Glutathione-s-transferase

30 IAM: iodoacetamide

31 TIMPs: Tissue inhibitor of metalloproteases

32 SCPs: SCP/Tpx-1/Ag5/PR-1/Sc7 domain containing proteins

33

34 **KEYWORDS:** *Ancylostoma caninum*, hookworm, proteomics, secretome,  
35 excretory/secretory products, vaccines, immunomodulation.

36

37 **ABSTRACT**

38 Hookworm infection is a major tropical parasitic disease affecting almost 500 million  
39 people worldwide. These soil-transmitted helminths can survive for many years in the  
40 intestine of the host, where they feed on blood, causing iron deficiency anaemia and  
41 other complications. To avoid the host's immune response the parasite releases  
42 excretory/secretory products (ESPs), a complex mixture of glycans, lipids and  
43 proteins that represent the major host-parasite interface. Using a combination of  
44 separation techniques such as SDS-PAGE and OFFGEL electrophoresis, in  
45 combination with state-of-the-art mass spectrometry we have reanalysed the dog  
46 hookworm, *Ancylostoma caninum*, ESPs (AcES). We identified 315 proteins present  
47 in the AcES, compared with just 105 identified in previous studies. The most highly  
48 represented family of proteins is the SCP/TAPs (90 of the 315 proteins), and the most  
49 abundant constituents of AcES are homologues of the tissue inhibitors of  
50 metalloproteases (TIMP) family. We identified putative vaccine candidates and  
51 proteins that could have immunomodulatory effects for treating inflammatory  
52 diseases. This study provides novel information about the proteins involved in host-  
53 hookworm interactions, and constitutes a comprehensive dataset for the development  
54 of vaccines and the discovery of new immunoregulatory biologics.

55

56

57 Soil-transmitted helminthiases (including trichuriasis, ascariasis and hookworm  
58 infections) are debilitating parasitic diseases that affect more than two billion people  
59 worldwide [1], with increased incidence occurring in impoverished and  
60 underdeveloped societies. Hookworms alone affect almost 500 million people in  
61 tropical regions of South America, Africa and Asia [2], and chronic infections result  
62 in iron-deficiency anaemia and even physical and intellectual retardation in young  
63 children [3]. Adult hookworms live in the intestine of vertebrate hosts where they  
64 feed on blood, and constantly release products into their surrounding environment  
65 through excretion and secretion mechanisms (excretory/secretory products, ESPs).  
66 The ESPs contain proteins that facilitate a parasitic existence, notably penetration of  
67 and migration within a host, feeding on host tissues, and evasion of the host immune  
68 response [4]. In addition, recently, hookworm ESPs have been shown to contain  
69 immunoregulatory properties that can protect mice against inflammatory diseases  
70 such as inflammatory bowel diseases and asthma [5-9].

71 Due to the difficulty in obtaining samples from the human hookworm *Necator*  
72 *americanus*, the dog hookworm *Ancylostoma caninum* has been extensively used as a  
73 model to study hookworm infections. The first proteomic characterisation of the ESPs  
74 produced by *A. caninum* (AcESP) was performed by Mulvenna et al. in 2009 [10];  
75 however, herein we revisit this data since the *A. caninum* genome was not available at  
76 the time and the sensitivity of mass spectrometers has improved dramatically since  
77 this last study was conducted.

78 A total of ~300 *A. caninum* adult worms were obtained from the small intestine of 5  
79 fresh cadaver dogs that had been naturally infected. Worms were divided into two  
80 different batches and incubated in 5x substrate (Dulbecco's Phosphate Buffered  
81 Saline (DPBS) (+) CaCl<sub>2</sub> (+) MgCl<sub>2</sub>, 5% antimycotic/antibiotic, 1% Glutamax) for 2 h

82 at 37°C and 5% CO<sub>2</sub> to reduce bacterial contamination. Hookworms were then  
83 transferred to 2x substrate and incubated for a further 24 h at 37°C and 5% CO<sub>2</sub> at a  
84 rate of ~ 50 worms per 25 ml of media.

85 A total of 50 µg of AcESP from batch 1 was separated by SDS-PAGE and 18 bands  
86 were excised from the gel, reduced using dithiothreitol (DTT), alkylated with  
87 iodoacetamide (IAM) and digested with trypsin overnight as described previously  
88 [10]. One hundred (100) micrograms of AcESP from batch 2 was reduced and  
89 alkylated using DTT and IAM, respectively followed by trypsin digestion overnight.  
90 Peptides were separated using an OFFGEL fractionator as previously described [10].  
91 All samples were desalted using C18 ZipTips after SDS-PAGE or Offgel separation.  
92 Peptides were analysed using a Shimadzu Prominane Nano HPLC coupled to an AB  
93 SCIEX Triple TOF+ 5600 mass spectrometer and processed using the software  
94 Analyst TF 1.6.1. The mass spectrometry proteomics data have been deposited to the  
95 ProteomeXchange Consortium via the PRIDE [11] partner repository with the dataset  
96 identifier PXD006511 and doi:10.6019/PXD006511.

97 Database searches were performed against a database consisting of the *A. caninum*  
98 genome and proteins from the common Repository of Adventitious Proteins (cRAP,  
99 <http://www.thegpm.org/crap/>) with Mascot using Mascot Daemon (v.2.5.1, Matrix  
100 Science) and X! Tandem (v.2015.12.15.2) and Comet (v.2016.01 rev.2) using  
101 PeptideShaker (v.1.11.0) [12].

102 A total of 237 and 289 proteins were identified with 2 or more peptides and FDR <1%  
103 using PeptideShaker and Mascot (Supplementary Table 1, 2), respectively, from  
104 which 211 were common between both search programs, while 26 and 78 were  
105 uniquely found by PeptideShaker and Mascot, respectively, resulting in a final  
106 quantity of 315 AcESP proteins (Supplementary Table 3). A total of 67 out of the 105

107 proteins identified by Mulvenna et al. [10] were also found in the present study  
108 (Figure 1A).

109 The top three most abundant proteins found by Mascot (Table 1) were  
110 ANCCAN\_13497 (a previously described tissue inhibitor of metalloproteases; TIMP  
111 [13]), ANCCAN\_25071 (a hypothetical protein), and ANCCAN\_19759 (a sperm-  
112 coating protein; SCP, also called SCP/Tpx-1/Ag5/PR-1/Sc7 domain containing  
113 proteins; SCP/TAPS). The top three proteins found by X! Tandem and Comet using  
114 PeptideShaker (Table 2) were ANCCAN\_03259 a platelet inhibitor,  
115 ANCCAN\_01699 an SCP protein, and ANCCAN\_13497 a TIMP (also found by  
116 Mascot in the top three most abundant proteins). TIMP proteins are a multifunctional  
117 family of inhibitors of matrix metalloproteases (MMP) associated with different  
118 functions in eukaryotic systems such as tissue remodelling, extracellular matrix  
119 turnover, cell proliferation and angiogenesis among others [14, 15]. However, in  
120 parasites, it has been previously suggested that TIMP-like proteins might not be  
121 functioning as MMP inhibitors [16]. The TIMP-like protein ANCCAN\_13497  
122 (previously identified as *Ac*-TMP-1 [13]) was already identified by Mulvenna et al. as  
123 the most abundant (and only TIMP-like) protein in the *Ac*ES [10]. Interestingly, other  
124 *A. caninum* TIMP-like protein, the renamed Anti-Inflammatory Protein-2 (AIP-2), has  
125 been shown to be a potent immunomodulatory protein that suppresses airway  
126 inflammation in a mouse model of asthma [7]. AIP-2 has extensive homology with  
127 other TIMPs found in *Ac*ES, including the highly abundant ANCCAN\_26655 and  
128 ANCCAN\_24968, suggesting that these two proteins could have similar  
129 immunomodulatory properties. Four different TIMPs are present in *Ac*ES, and are  
130 highly abundant based on the emPAI and spectral count.

131 The SCP proteins are highly represented in the infective larval stage of hookworms  
132 [17], where a role in larval penetration and infection has been hypothesized (reviewed  
133 by [18]). They have also been speculated to be involved in immunomodulation [19].  
134 For instance, an *A. caninum* SCP-like protein (known as Neutrophil Inhibitory factor;  
135 NIF) is able to inhibit neutrophil function and oxidative stress [20]. Although we  
136 didn't find this protein in the adult secretions, we have found two SCPs having  
137 extensive homology with the NIF sequence deposited in NCBI (accession number  
138 AAA27789.1): ANCCAN\_04194 (88% identity and E-value =  $6.9 \times 10^{-89}$ ) and  
139 ANCCAN\_22933 (94.3% identity and E-value =  $1.5 \times 10^{-65}$ ). This could refer to a  
140 missannotation of the genome, since a blast search against the *A. caninum* genome  
141 using the deposited NIF sequence doesn't return any sequence with 100% homology.  
142 SCP-related proteins (including SCPs and SCP-like proteins) contributed to 90 out of  
143 315 (31%) of the overall protein families and were by far the most highly represented  
144 family of proteins in the AcES (Figure 1B). These results suggest that the SCP family  
145 might play a key role in orchestrating a parasitic existence and modulating the host's  
146 immune response, and further studies should focus on this family of proteins.

147 Among the most represented protein domains in AcES was the metallopeptidase  
148 family M13 (11 proteins), the transthyretin-like family (10 proteins), astacin  
149 metalloproteases (7 proteins) and glutathione-s-transferases (GSTs; 6 proteins). The  
150 role of peptidases in the secretome of helminths have been linked to important roles in  
151 parasitism [21]; however, the roles of transthyretin-like proteins are still unknown  
152 (despite their abundance in nematodes in particular). Astacins are a family of  
153 metallopeptidases highly abundant in the secretome of helminths [22]. Indeed, the  
154 human hookworm *N. americanus* has 82 astacin-encoding genes [23], and astacins are  
155 abundantly represented in ESPs of the rat hookworm *Nippostrongylus brasiliensis*

156 [24] and other nematodes [25]. The role of astacins is not fully understood, although,  
157 in nematodes, they have been shown to participate in host invasion and parasite  
158 development [26, 27]. It is also noteworthy to highlight the presence of GSTs in the  
159 *AcES* proteome. *Na*-GST-1, a GST secreted by adult stage *N. americanus* that is  
160 thought to play a role in feeding by detoxifying the free heme produced after  
161 hemoglobin ingestion, is being currently tested as a vaccine against *N. americanus*  
162 [28]. Other molecules that have been tested as vaccines against hookworms include  
163 aspartic proteases [29] and cysteine proteases [30], which are protein families also  
164 represented in our study (Figure 1B). In the present study we found 5 different  
165 cysteine proteases (ANCCAN\_06649, ANCCAN\_06644, ANCCAN\_30567,  
166 ANCCAN\_06619 and ANCCAN\_06647) and four aspartic proteases  
167 (ANCCAN\_18339, ANCCAN\_13546, ANCCAN\_29459 and ANCCAN\_25067)  
168 Thus, it is tempting to speculate that the GSTs, cysteine proteases and aspartic  
169 proteases identified in the present study could be potential vaccines against the dog  
170 hookworm.

171 In the present study we have reanalysed the protein constituents of *AcES* in order to  
172 gain a more comprehensive snapshot of the hookworm secretome and how this  
173 impacts on host-pathogen interactions. We have identified almost three times as many  
174 proteins as previously reported in the ESP of this important parasite. In addition, new  
175 proteins of interest with potential as both novel immunoregulatory biologics and  
176 vaccine candidates have been identified, and clearly warrant future exploration.

177

## 178 ACKNOWLEDGMENTS

179 This work was supported by a program grant from the National Health and Medical  
180 Research Council (NHMRC) [program grant number 1037304] and a Senior Principal



181 Research fellowship from NHMRC to AL (1117504). The funders had no role in  
182 study design, data collection and analysis, decision to publish, or preparation of the  
183 manuscript. The authors declare no competing financial interests.

184

185 **REFERENCES**

186

187 [1] Hotez, P. J., Brindley, P. J., Bethony, J. M., King, C. H., *et al.*, Helminth

188 infections: the great neglected tropical diseases. *J Clin Invest* 2008, *118*, 1311-1321.

189 [2] Pullan, R. L., Smith, J. L., Jasrasaria, R., Brooker, S. J., Global numbers of

190 infection and disease burden of soil transmitted helminth infections in 2010. *Parasit*

191 *Vectors* 2014, *7*, 37.

192 [3] Bethony, J., Brooker, S., Albonico, M., Geiger, S. M., *et al.*, Soil-transmitted

193 helminth infections: ascariasis, trichuriasis, and hookworm. *Lancet* 2006, *367*, 1521-

194 1532.

195 [4] Lightowers, M. W., Rickard, M. D., Excretory-secretory products of helminth

196 parasites: effects on host immune responses. *Parasitology* 1988, *96 Suppl*, S123-166.

197 [5] Cancado, G. G., Fiuza, J. A., de Paiva, N. C., Lemos Lde, C., *et al.*, Hookworm

198 products ameliorate dextran sodium sulfate-induced colitis in BALB/c mice. *Inflamm*

199 *Bowel Dis* 2011, *17*, 2275-2286.

200 [6] Ferreira, I., Smyth, D., Gaze, S., Aziz, A., *et al.*, Hookworm excretory/secretory

201 products induce interleukin-4 (IL-4)+ IL-10+ CD4+ T cell responses and suppress

202 pathology in a mouse model of colitis. *Infect Immun* 2013, *81*, 2104-2111.

203 [7] Navarro, S., Pickering, D. A., Ferreira, I. B., Jones, L., *et al.*, Hookworm

204 recombinant protein promotes regulatory T cell responses that suppress experimental

205 asthma. *Sci Transl Med* 2016, *8*, 362ra143.

206 [8] Ruysers, N. E., De Winter, B. Y., De Man, J. G., Loukas, A., *et al.*, Therapeutic

207 potential of helminth soluble proteins in TNBS-induced colitis in mice. *Inflamm*

208 *Bowel Dis* 2009, *15*, 491-500.

- 209 [9] Sotillo, J., Ferreira, I., Potriquet, J., Laha, T., *et al.*, Changes in protein expression  
210 after treatment with *Ancylostoma caninum* excretory/secretory products in a mouse  
211 model of colitis. *Sci Rep* 2017, 7, 41883.
- 212 [10] Mulvenna, J., Hamilton, B., Nagaraj, S. H., Smyth, D., *et al.*, Proteomics analysis  
213 of the excretory/secretory component of the blood-feeding stage of the hookworm,  
214 *Ancylostoma caninum*. *Mol Cell Proteomics* 2009, 8, 109-121.
- 215 [11] Vizcaino, J. A., Csordas, A., del-Toro, N., Dianes, J. A., *et al.*, 2016 update of  
216 the PRIDE database and its related tools. *Nucleic Acids Res* 2016, 44, D447-456.
- 217 [12] Vaudel, M., Burkhardt, J. M., Zahedi, R. P., Oveland, E., *et al.*, PeptideShaker  
218 enables reanalysis of MS-derived proteomics data sets. *Nat Biotechnol* 2015, 33, 22-  
219 24.
- 220 [13] Zhan, B., Badamchian, M., Meihua, B., Ashcom, J., *et al.*, Molecular cloning and  
221 purification of Ac-TMP, a developmentally regulated putative tissue inhibitor of  
222 metalloprotease released in relative abundance by adult *Ancylostoma* hookworms. *Am*  
223 *J Trop Med Hyg* 2002, 66, 238-244.
- 224 [14] Brew, K., Nagase, H., The tissue inhibitors of metalloproteinases (TIMPs): an  
225 ancient family with structural and functional diversity. *Biochim Biophys Acta* 2010,  
226 1803, 55-71.
- 227 [15] Banyai, L., Patthy, L., The NTR module: domains of netrins, secreted frizzled  
228 related proteins, and type I procollagen C-proteinase enhancer protein are  
229 homologous with tissue inhibitors of metalloproteases. *Protein Sci* 1999, 8, 1636-  
230 1642.
- 231 [16] Cantacessi, C., Hofmann, A., Pickering, D., Navarro, S., *et al.*, TIMPs of  
232 parasitic helminths - a large-scale analysis of high-throughput sequence datasets.  
233 *Parasit Vectors* 2013, 6, 156.

- 234 [17] Datu, B. J., Gasser, R. B., Nagaraj, S. H., Ong, E. K., *et al.*, Transcriptional  
235 changes in the hookworm, *Ancylostoma caninum*, during the transition from a free-  
236 living to a parasitic larva. *PLoS Negl Trop Dis* 2008, 2, e130.
- 237 [18] Cantacessi, C., Campbell, B. E., Visser, A., Geldhof, P., *et al.*, A portrait of the  
238 "SCP/TAPS" proteins of eukaryotes-developing a framework for fundamental  
239 research and biotechnological outcomes. *Biotechnol Adv* 2009, 27, 376-388.
- 240 [19] Osman, A., Wang, C. K., Winter, A., Loukas, A., *et al.*, Hookworm SCP/TAPS  
241 protein structure-A key to understanding host-parasite interactions and developing  
242 new interventions. *Biotechnol Adv* 2012, 30, 652-657.
- 243 [20] Moyle, M., Foster, D. L., McGrath, D. E., Brown, S. M., *et al.*, A hookworm  
244 glycoprotein that inhibits neutrophil function is a ligand of the integrin CD11b/CD18.  
245 *J Biol Chem* 1994, 269, 10008-10015.
- 246 [21] Hewitson, J. P., Grainger, J. R., Maizels, R. M., Helminth immunoregulation: the  
247 role of parasite secreted proteins in modulating host immunity. *Mol Biochem*  
248 *Parasitol* 2009, 167, 1-11.
- 249 [22] Cuesta-Astroz, Y., Oliveira, F. S., Nahum, L. A., Oliveira, G., Helminth  
250 secretomes reflect different lifestyles and parasitized hosts. *Int J Parasitol* 2017.
- 251 [23] Tang, Y. T., Gao, X., Rosa, B. A., Abubucker, S., *et al.*, Genome of the human  
252 hookworm *Necator americanus*. *Nat Genet* 2014, 46, 261-269.
- 253 [24] Sotillo, J., Sanchez-Flores, A., Cantacessi, C., Harcus, Y., *et al.*, Secreted  
254 proteomes of different developmental stages of the gastrointestinal nematode  
255 *Nippostrongylus brasiliensis*. *Mol Cell Proteomics* 2014, 13, 2736-2751.
- 256 [25] Hunt, V. L., Tsai, I. J., Coghlan, A., Reid, A. J., *et al.*, The genomic basis of  
257 parasitism in the Strongyloides clade of nematodes. *Nat Genet* 2016, 48, 299-307.

258 [26] Williamson, A. L., Lustigman, S., Oksov, Y., Deumic, V., *et al.*, *Ancylostoma*  
259 *caninum* MTP-1, an astacin-like metalloprotease secreted by infective hookworm  
260 larvae, is involved in tissue migration. *Infect Immun* 2006, *74*, 961-967.

261 [27] Gamble, H. R., Fetterer, R. H., Mansfield, L. S., Developmentally regulated zinc  
262 metalloproteinases from third- and fourth-stage larvae of the ovine nematode  
263 *Haemonchus contortus*. *J Parasitol* 1996, *82*, 197-202.

264 [28] Diemert, D. J., Freire, J., Valente, V., Fraga, C. G., *et al.*, Safety and  
265 immunogenicity of the Na-GST-1 hookworm vaccine in Brazilian and American  
266 adults. *PLoS Negl Trop Dis* 2017, *11*, e0005574.

267 [29] Hotez, P. J., Beaumier, C. M., Gillespie, P. M., Strych, U., *et al.*, Advancing a  
268 vaccine to prevent hookworm disease and anemia. *Vaccine* 2016, *34*, 3001-3005.

269 [30] Loukas, A., Bethony, J. M., Williamson, A. L., Goud, G. N., *et al.*, Vaccination  
270 of dogs with a recombinant cysteine protease from the intestine of canine hookworms  
271 diminishes the fecundity and growth of worms. *J Infect Dis* 2004, *189*, 1952-1961.

272

273

## 274 **FIGURE LEGENDS**

275 **Fig. 1.** (A) Comparison between the number of *Ancylostoma caninum*  
276 excretory/secretory proteins (*AcES*) identified by Mulvenna et al. [10] and the present  
277 study. (B) Top ten most represented protein families in the *AcES* after a Pfam  
278 analysis. CAP: Cysteine-rich secretory protein family.

279

280 **Table 1.** Top 20 proteins found by Mascot in the excretory/secretory products of  
 281 *Ancylostoma caninum* adult worms based on emPAI. Proteins were identified by  
 282 SDS-PAGE, Offgel, or both. CAP: Cysteine-rich secretory protein family; DOMON:  
 283 dopamine beta-monooxygenase N-terminal; NTR: UNC-6/NTR/C345C module; SCP:  
 284 sperm-coating protein; TIMP: tissue inhibitor of metalloproteases.

| Accession Number | Description                   | No. Validated Unique Peptides |     | emPAI |      | Pfam                                            |
|------------------|-------------------------------|-------------------------------|-----|-------|------|-------------------------------------------------|
|                  |                               | SDS                           | OGE | SDS   | OGE  |                                                 |
| ANCCAN_13497     | TIMP-like                     | 13                            | 9   | 60.86 | 16.4 | NTR domain (PF01759)                            |
| ANCCAN_25071     | Hypothetical protein          | 10                            | 5   | 26.08 | 3.15 | CAP domain (PF00188)                            |
| ANCCAN_19759     | SCP                           | 12                            | 6   | 21.95 | 2.54 | CAP domain (PF00188)                            |
| ANCCAN_20483     | DOMON domain-like protein     | 10                            | 2   | 18.18 | 0.99 | DOMON domain (PF03351)                          |
| ANCCAN_03257     | Platelet inhibitor            | 2                             | -   | 16.71 | -    | -                                               |
| ANCCAN_03259     | SCP                           | 3                             | 3   | 8.03  | 8.12 | CAP domain (PF00188)                            |
| ANCCAN_26655     | TIMP-like                     | 7                             | 4   | 10.05 | 2.89 | NTR domain (PF01759)                            |
| ANCCAN_23843     | Glu/Leu/Phe/Val dehydrogenase | 10                            | -   | 11.94 | -    | Glu/Leu/Phe/Val dehydrogenase domain (PF02812)  |
| ANCCAN_26341     | Glutamate dehydrogenase       | 11                            | 3   | 10.78 | 0.86 | Glu/Leu/Phe/Val dehydrogenase domain (PF02812)  |
| ANCCAN_16282     | Hypothetical protein          | 5                             | 2   | 9.15  | 1.54 | -                                               |
| ANCCAN_08479     | SCP                           | 8                             | 3   | 9.19  | 1.05 | CAP domain (PF00188)                            |
| ANCCAN_01923     | Hypothetical protein          | 11                            | 3   | 9.61  | 0.56 | Protein of unknown function (DUF3270) (PF11674) |
| ANCCAN_17690     | SCP-like protein              | 17                            | 7   | 8.21  | 1.05 | CAP domain (PF00188)                            |
| ANCCAN_21219     | SCP                           | 6                             | 3   | 6.73  | 2.14 | CAP domain                                      |

|              |                                   |    |   |      |      |                                             |
|--------------|-----------------------------------|----|---|------|------|---------------------------------------------|
|              |                                   |    |   |      |      | (PF00188)                                   |
| ANCCAN_18161 | Galactoside-binding lectin family | 18 | 8 | 7.12 | 1.43 | Galactoside-binding lectin domain (PF00337) |
| ANCCAN_06585 | SCP                               | 4  | - | 6.84 | -    | CAP domain (PF00188)                        |
| ANCCAN_04963 | Apyrase                           | 15 | 5 | 6.4  | 0.7  | Apyrase domain (PF06079)                    |
| ANCCAN_00673 | Hypothetical protein              | -  | 3 | -    | 5.81 | -                                           |
| ANCCAN_24968 | TIMP-like                         | 5  | 3 | 4.2  | 1.04 | TIMP domain (PF00965)                       |
| ANCCAN_03218 | Hypothetical protein              | -  | 6 | -    | 4.87 | -                                           |

285

286

287 **Table 2.** Top 20 proteins found by X! Tandem and Comet in the excretory/secretory  
 288 products of *Ancylostoma caninum* adult worms based on spectrum counting. Proteins  
 289 were identified by SDS-PAGE, Offgel, or both. AnfO\_nitrog: Iron only nitrogenase  
 290 protein AnfO; CAP: Cysteine-rich secretory protein family; NTR: UNC-  
 291 6/NTR/C345C module; SCP: sperm-coating protein; TIMP: tissue inhibitor of  
 292 metalloproteases.

| Accession Number | Description                  | No. Validated Unique Peptides |     | Spectrum Count |        | Pfam                         |
|------------------|------------------------------|-------------------------------|-----|----------------|--------|------------------------------|
|                  |                              | SDS                           | OGE | SDS            | OGE    |                              |
| ANCCAN_03257     | Platelet Inhibitor           | 4                             | 7   | 12605.4        | 3157.9 | -                            |
| ANCCAN_01699     | SCP                          | 3                             | -   | 9940.4         | -      | CAP domain (PF00188)         |
| ANCCAN_13497     | TIMP-like                    | 17                            | 15  | 1674.2         | 4779.2 | NTR domain (PF01759)         |
| ANCCAN_03254     | SCP-like protein             | 7                             | 5   | 2278           | 1622.4 | CAP domain (PF00188)         |
| ANCCAN_03218     | Hypothetical protein         | -                             | 5   | -              | 2280.6 | -                            |
| ANCCAN_03214     | Hypothetical protein         | 7                             | -   | -              | 2244.7 | -                            |
| ANCCAN_23152     | Hypothetical protein         | 3                             | -   | -              | 2060.2 | AnfO_nitrog domain (PF09582) |
| ANCCAN_11008     | Secreted protein 4 precursor | 2                             | 3   | 517.8          | 2046.8 | -                            |
| ANCCAN_20841     | Unknown                      | 4                             | 3   | 495.5          | 1982.6 | -                            |
| ANCCAN_13591     | Hypothetical protein         | -                             | 4   | -              | 1869.4 | -                            |
| ANCCAN_16282     | Hypothetical protein         | 5                             | -   | 1737.3         | -      | -                            |
| ANCCAN_25071     | Hypothetical protein         | 8                             | 6   | 1395.2         | 1587.6 | CAP domain (PF00188)         |
| ANCCAN_26655     | TIMP-like                    | 3                             | 2   | 1567.9         | 1196.3 | NTR domain (PF01759)         |
| ANCCAN_10664     | TIMP-like                    | -                             | 2   | -              | 1455.6 | TIMP domain (PF00965)        |
| ANCCAN_19423     | Hypothetical protein         | -                             | 4   | -              | 1238.5 | -                            |
| ANCCAN_05485     | SCP-like protein             | 3                             | 2   | 564.8          | 1093.2 | CAP domain (PF00188)         |



|              |                                                   |   |   |        |        |                                                   |
|--------------|---------------------------------------------------|---|---|--------|--------|---------------------------------------------------|
| ANCCAN_18168 | Kunitz Bovine pancreatic trypsin inhibitor domain | - | 3 | -      | 1082.6 | Kunitz/Bovine pancreatic trypsin domain (PF00014) |
| ANCCAN_25718 | Excretory secretory protein 1                     | 2 | 3 | 1060.7 | 1394.7 | -                                                 |
| ANCCAN_05778 | Copper zinc superoxide dismutase                  | 6 | 5 | 525.6  | 947.6  | Copper/zinc superoxide dismutase domain (PF00080) |
| ANCCAN_19037 | Hypothetical protein                              | - | 4 | -      | 881.3  | -                                                 |

293

A

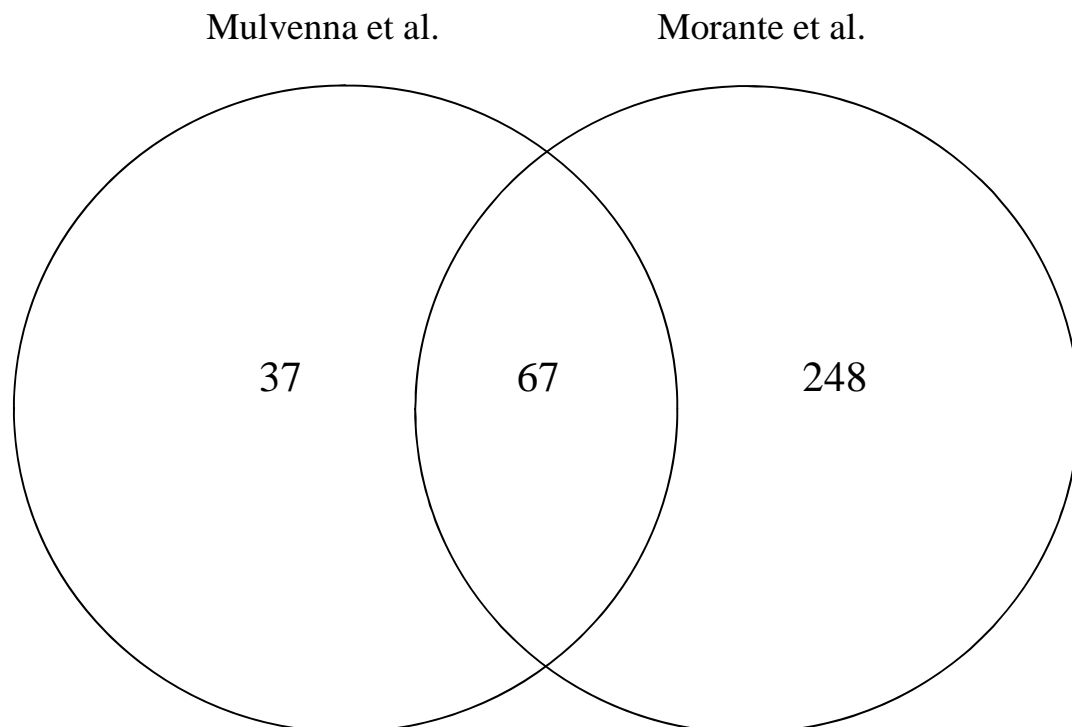

B

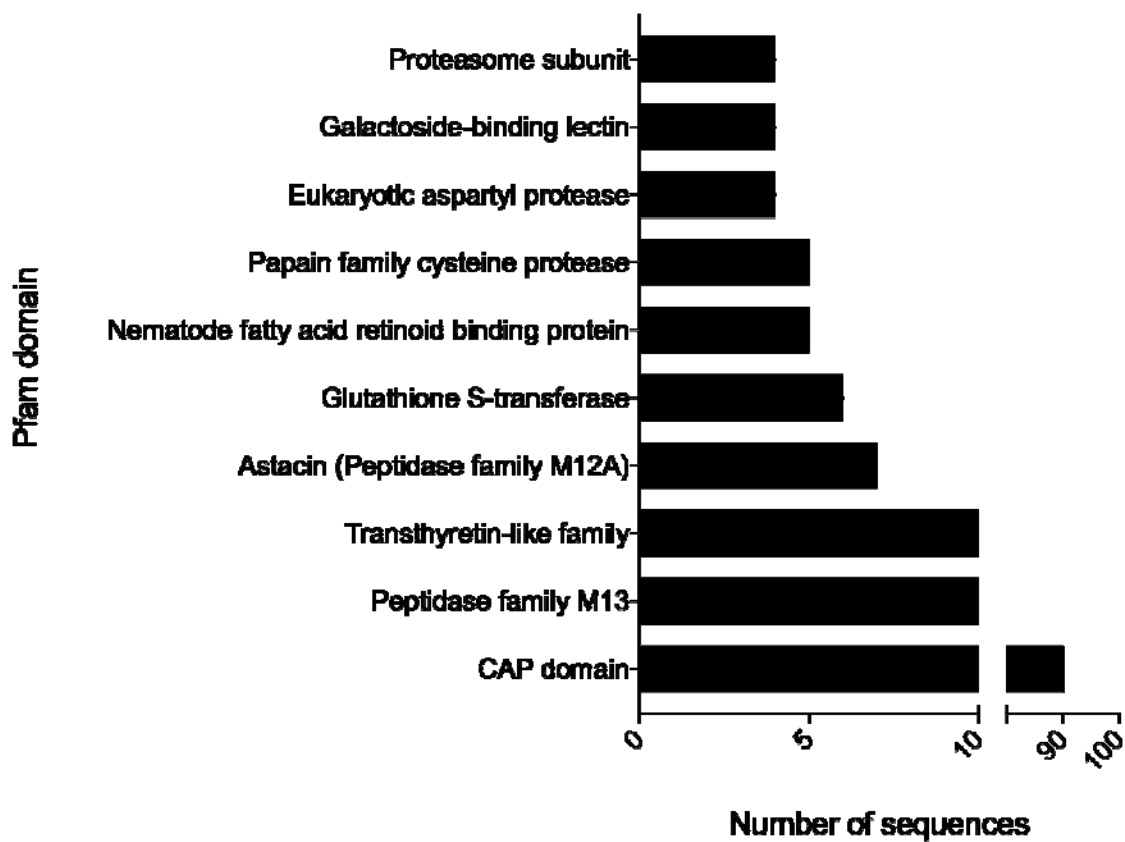

Source: http://biorxiv.org/content/10.1101/139006v1.full.pdf
